# Supplementary material for: Pediatric gastroenteritis in the emergency department: practice evaluation in Belgium, France, The Netherlands and Switzerland
Source: PubMed Central journal article supplement (PMC4045874; doi:10.1186/1471-2431-14-125), 2014-05-16
Supplement: 1471-2431-14-125-S1.pdf [file 1471-2431-14-125-S1.pdf]

## Hospital

## What is your role in the unit?

## How many years you been working in a pediatric emergency department?

## How many patients under 18 years of age come annually to your emergency department?

## City

## Country

## In the following scenario, how often do you initiate rehydration ORALLY as first-line therapy?

«You evaluate a 15-month-old child with a history and physical examination consistent with moderate dehydration. The child has had 7 episodes of nonbloody diarrhea today and 5 episodes of vomiting, with the last occurring 45 minutes ago. The presumed etiology is infectious gastroenteritis»

- <5% or never  
 5 to 30%  
 31 to 69%  
 70 to 95%  
 >95% or always

## In case of oral rehydration, which fluid do you use?

|                                                               | < 5% or never         | 5 to 30%              | 31 to 69%             | 70 to 95%             | > 95% or always       |
|---------------------------------------------------------------|-----------------------|-----------------------|-----------------------|-----------------------|-----------------------|
| Oral rehydration solution (ORS)                               | <input type="radio"/> | <input type="radio"/> | <input type="radio"/> | <input type="radio"/> | <input type="radio"/> |
| Modified Oral rehydration solution (sugar, juice, water, ...) | <input type="radio"/> | <input type="radio"/> | <input type="radio"/> | <input type="radio"/> | <input type="radio"/> |
| fruit juice                                                   | <input type="radio"/> | <input type="radio"/> | <input type="radio"/> | <input type="radio"/> | <input type="radio"/> |
| soda                                                          | <input type="radio"/> | <input type="radio"/> | <input type="radio"/> | <input type="radio"/> | <input type="radio"/> |

Other, please precise

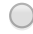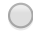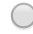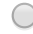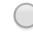

### If you sometimes use other fluids, please precise the type of fluid

### In the following scenario, in case of oral rehydration therapy (ORT) FAILURE which method do you use?

«You evaluate a 15-month-old child with a history and physical examination consistent with moderate dehydration. The child has had 7 episodes of nonbloody diarrhea today and 5 episodes of vomiting, with the last occurring 45 minutes ago. The presumed etiology is infectious gastroenteritis»

|                                               | < 5% or never         | 5 to 30%              | 31 to 69%             | 70 to 95%             | > 95% or always       |
|-----------------------------------------------|-----------------------|-----------------------|-----------------------|-----------------------|-----------------------|
| Intravenous rehydration                       | <input type="radio"/> | <input type="radio"/> | <input type="radio"/> | <input type="radio"/> | <input type="radio"/> |
| Enteral rehydration via the nasogastric route | <input type="radio"/> | <input type="radio"/> | <input type="radio"/> | <input type="radio"/> | <input type="radio"/> |

### In case of INTRAVENOUS rehydration in this situation, which fluid do you use more often during the first four hours? ( commercial name)

In the 5 following questions please describe the fluid you use for intravenous rehydration

### Glucose concentration of the IV solution

Glucose : G/L

### Sodium concentration of the IV solution

Na<sup>+</sup> : G/L

### Potassium concentration of the IV solution

K<sup>+</sup>: G/L

### Bicarbonate concentration of the IV solution

Bicar: G/L

### fluid volume used in the first 4 hours

mL/kg/h

**If you use ENTERAL rehydration via the nasogastric route, which solution do you use ? if you don't, do not respond**

Oral rehydration solution

Autre :

**If you use an other solution, please precise**

**In the following scenario, in case of Oral rehydration therapy failure, how often do you realize those tests?**

«You evaluate a 15-month-old child with a history and physical examination consistent with moderate dehydration. The child has had 7 episodes of nonbloody diarrhea today and 5 episodes of vomiting, with the last occurring 45 minutes ago. The presumed etiology is infectious gastroenteritis»

|                                                          | < 5% or never         | 5 to 30%              | 31 to 69%             | 70 to 95%             | > 95% or always       |
|----------------------------------------------------------|-----------------------|-----------------------|-----------------------|-----------------------|-----------------------|
| <i>blood count</i>                                       | <input type="radio"/> | <input type="radio"/> | <input type="radio"/> | <input type="radio"/> | <input type="radio"/> |
| <i>serum electrolytes (Na, K, Cl, Bicarbonate, Urea)</i> | <input type="radio"/> | <input type="radio"/> | <input type="radio"/> | <input type="radio"/> | <input type="radio"/> |
| <i>Glycemia</i>                                          | <input type="radio"/> | <input type="radio"/> | <input type="radio"/> | <input type="radio"/> | <input type="radio"/> |
| <i>CRP</i>                                               | <input type="radio"/> | <input type="radio"/> | <input type="radio"/> | <input type="radio"/> | <input type="radio"/> |
| <i>Procalcitonin</i>                                     | <input type="radio"/> | <input type="radio"/> | <input type="radio"/> | <input type="radio"/> | <input type="radio"/> |
| <i>blood culture</i>                                     | <input type="radio"/> | <input type="radio"/> | <input type="radio"/> | <input type="radio"/> | <input type="radio"/> |
| <i>stool culture</i>                                     | <input type="radio"/> | <input type="radio"/> | <input type="radio"/> | <input type="radio"/> | <input type="radio"/> |
| <i>stool virology</i>                                    | <input type="radio"/> | <input type="radio"/> | <input type="radio"/> | <input type="radio"/> | <input type="radio"/> |
| <i>stool parasitology</i>                                | <input type="radio"/> | <input type="radio"/> | <input type="radio"/> | <input type="radio"/> | <input type="radio"/> |
| <i>other</i>                                             | <input type="radio"/> | <input type="radio"/> | <input type="radio"/> | <input type="radio"/> | <input type="radio"/> |

**In the following scenario, in case of Oral rehydration therapy failure, how often do you initiate a pharmacological treatment ? and which one do you use ?**

« You evaluate a 15-month-old child with a history and physical examination consistent with moderate dehydration. The child has had seven episodes of nonbloody diarrhea today and five episodes of vomiting, with the last occurring 45 minutes ago. The presumed etiology is infectious gastroenteritis »

|                       | < 5% or never         | 5 to 30%              | 31 to 69%             | 70 to 95%             | > 95% or always       |
|-----------------------|-----------------------|-----------------------|-----------------------|-----------------------|-----------------------|
| <i>Ondansetron</i>    | <input type="radio"/> | <input type="radio"/> | <input type="radio"/> | <input type="radio"/> | <input type="radio"/> |
| <i>Metoclopramide</i> | <input type="radio"/> | <input type="radio"/> | <input type="radio"/> | <input type="radio"/> | <input type="radio"/> |

|                                               |                       |                       |                       |                       |                       |
|-----------------------------------------------|-----------------------|-----------------------|-----------------------|-----------------------|-----------------------|
| <i>Domperidone</i>                            | <input type="radio"/> | <input type="radio"/> | <input type="radio"/> | <input type="radio"/> | <input type="radio"/> |
| <i>Loperamide</i>                             | <input type="radio"/> | <input type="radio"/> | <input type="radio"/> | <input type="radio"/> | <input type="radio"/> |
| <i>Smectite</i>                               | <input type="radio"/> | <input type="radio"/> | <input type="radio"/> | <input type="radio"/> | <input type="radio"/> |
| <i>Racecadotril</i>                           | <input type="radio"/> | <input type="radio"/> | <input type="radio"/> | <input type="radio"/> | <input type="radio"/> |
| <i>Antibiotic</i>                             | <input type="radio"/> | <input type="radio"/> | <input type="radio"/> | <input type="radio"/> | <input type="radio"/> |
| <i>Lactobacillus GG</i>                       | <input type="radio"/> | <input type="radio"/> | <input type="radio"/> | <input type="radio"/> | <input type="radio"/> |
| <i>Saccharomyces<br/>boulardii</i>            | <input type="radio"/> | <input type="radio"/> | <input type="radio"/> | <input type="radio"/> | <input type="radio"/> |
| <i>other treatment or other<br/>probiotic</i> | <input type="radio"/> | <input type="radio"/> | <input type="radio"/> | <input type="radio"/> | <input type="radio"/> |

**If you use an other treatment, please precise which one**

**In case oral rehydration therapy failure, how long do you wait ( in hours) before restarting feeding ? (ORS excluded)**

N'envoyez jamais de mots de passe via Google Formulaires.

Fourni par [Google Documents](#)

[Signaler un cas d'utilisation abusive](#) - [Conditions d'utilisation](#) - [Clauses additionnelles](#)
